# Supplementary material for: Clinical Proof-of-Concept Study With MSDC-0160, a Prototype mTOT-Modulating Insulin Sensitizer
Source: PubMed Central journal article supplement — Clin Pharmacol Ther. 2013 Mar 6;93(4):352–9. doi: 10.1038/clpt.2013.10 (PMC3604641; doi:10.1038/clpt.2013.10), 2013-03-06

FPG Change from Baseline by Visit

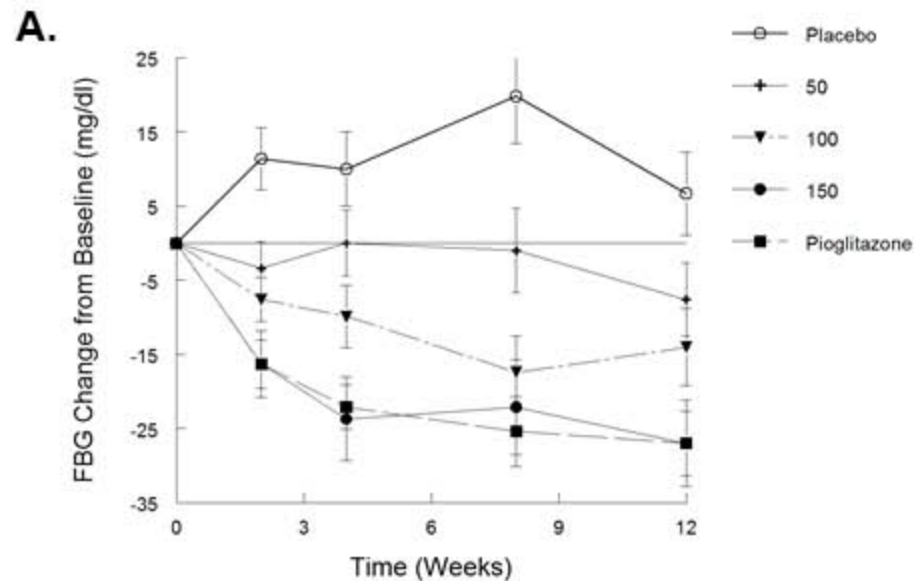

HOMA-IR Change from Baseline by Visit

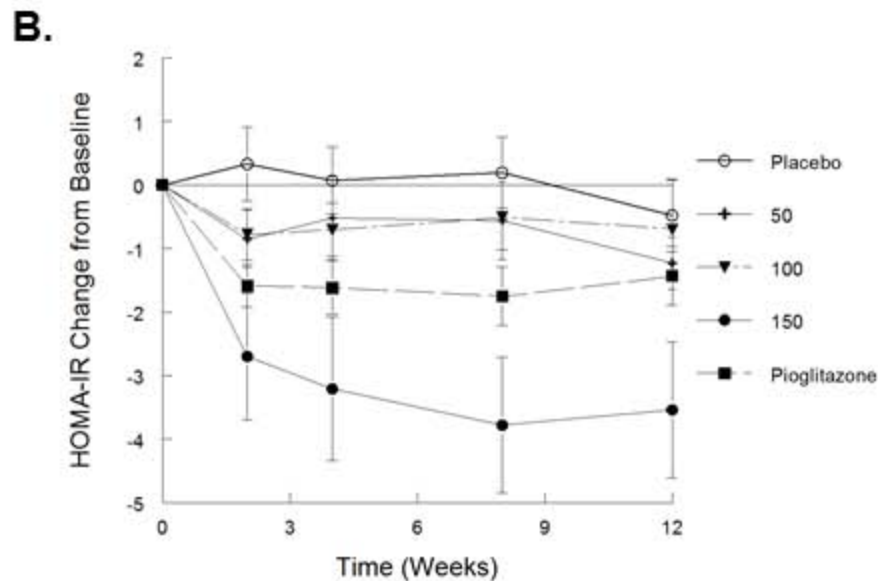

**C.** Hematocrit Change from Baseline by Visit

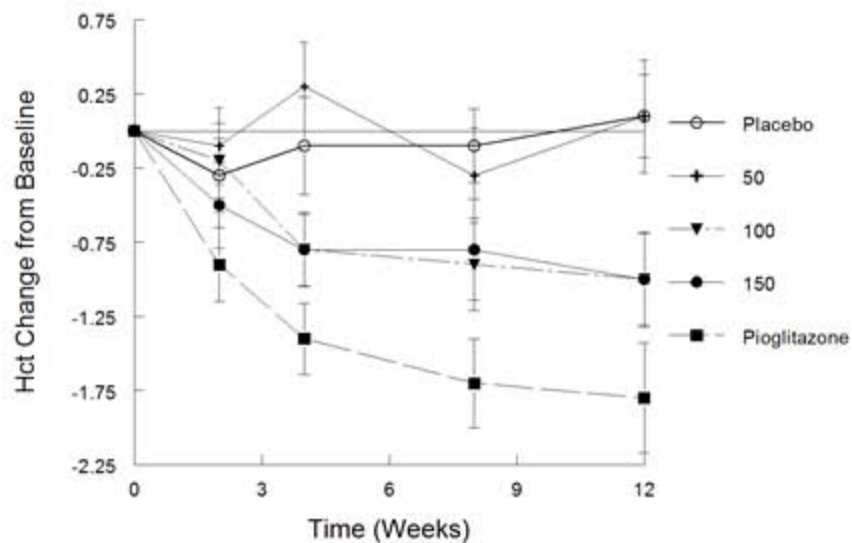

**D.** RBC Change from Baseline by Visit

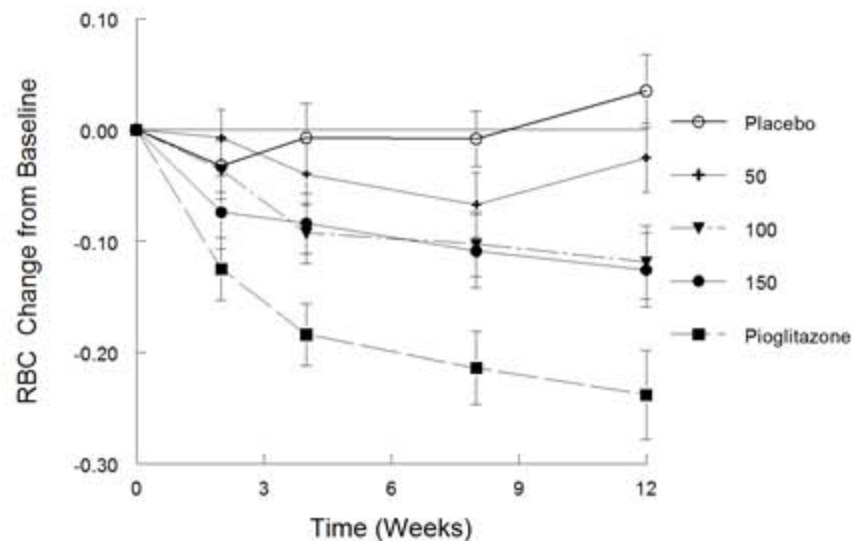

Supplement: clpt201310x2.pdf [file clpt201310x2.pdf]
