# Supplementary material for: Clinical Proof-of-Concept Study With MSDC-0160, a Prototype mTOT-Modulating Insulin Sensitizer
Source: PubMed Central journal article supplement — Clin Pharmacol Ther. 2013 Mar 6;93(4):352–9. doi: 10.1038/clpt.2013.10 (PMC3604641; doi:10.1038/clpt.2013.10), 2013-03-06
Supplement: clpt201310x4.pdf [file clpt201310x4.pdf]

Formatted: Left: 1", Right: 1", Width: 11", Height: 8.5"

Table S1. Summary of Drug-Related Treatment-Emergent Adverse Events by System Organ Class and Preferred Term During the Double-Blind Treatment Period – Safety Population

| System organ class<br>Preferred term                 | Placebo<br>(N = 71)<br>n (%) | MSDC-0160<br>50 mg<br>(N = 71)<br>n (%) | MSDC-0160<br>100 mg<br>(N = 71)<br>n (%) | MSDC-0160<br>150 mg<br>(N = 70)<br>n (%) | Pioglitazone<br>45 mg<br>(N = 71)<br>n (%) | Total<br>(N = 354)<br>n (%) |
|------------------------------------------------------|------------------------------|-----------------------------------------|------------------------------------------|------------------------------------------|--------------------------------------------|-----------------------------|
| Nervous system disorders                             | 1 (1.4)                      | 2 (2.8)                                 | 3 (4.2)                                  | 1 (1.4)                                  | 2 (2.8)                                    | 9 (2.5)                     |
| Headache                                             | 1 (1.4)                      | 1 (1.4)                                 | 2 (2.8)                                  | 0 (0.0)                                  | 1 (1.4)                                    | 5 (1.4)                     |
| Dizziness                                            | 0 (0.0)                      | 1 (1.4)                                 | 0 (0.0)                                  | 0 (0.0)                                  | 1 (1.4)                                    | 2 (0.6)                     |
| Balance disorder                                     | 0 (0.0)                      | 0 (0.0)                                 | 1 (1.4)                                  | 0 (0.0)                                  | 0 (0.0)                                    | 1 (0.3)                     |
| Lethargy                                             | 0 (0.0)                      | 0 (0.0)                                 | 0 (0.0)                                  | 1 (1.4)                                  | 0 (0.0)                                    | 1 (0.3)                     |
| Gastrointestinal disorders                           | 2 (2.8)                      | 1 (1.4)                                 | 0 (0.0)                                  | 0 (0.0)                                  | 1 (1.4)                                    | 4 (1.1)                     |
| Diarrhea                                             | 1 (1.4)                      | 1 (1.4)                                 | 0 (0.0)                                  | 0 (0.0)                                  | 0 (0.0)                                    | 2 (0.6)                     |
| Constipation                                         | 1 (1.4)                      | 0 (0.0)                                 | 0 (0.0)                                  | 0 (0.0)                                  | 0 (0.0)                                    | 1 (0.3)                     |
| Dyspepsia                                            | 0 (0.0)                      | 0 (0.0)                                 | 0 (0.0)                                  | 0 (0.0)                                  | 1 (1.4)                                    | 1 (0.3)                     |
| Nausea                                               | 0 (0.0)                      | 0 (0.0)                                 | 0 (0.0)                                  | 0 (0.0)                                  | 1 (1.4)                                    | 1 (0.3)                     |
| General disorders and administration site conditions | 0 (0.0)                      | 1 (1.4)                                 | 1 (1.4)                                  | 2 (2.9)                                  | 0 (0.0)                                    | 4 (1.1)                     |
| Edema peripheral                                     | 0 (0.0)                      | 0 (0.0)                                 | 1 (1.4)                                  | 2 (2.9)                                  | 0 (0.0)                                    | 3 (0.8)                     |
| Feeling cold                                         | 0 (0.0)                      | 1 (1.4)                                 | 0 (0.0)                                  | 0 (0.0)                                  | 0 (0.0)                                    | 1 (0.3)                     |
| Investigations                                       | 1 (1.4)                      | 1 (1.4)                                 | 1 (1.4)                                  | 1 (1.4)                                  | 0 (0.0)                                    | 4 (1.1)                     |
| Alanine aminotransferase increased                   | 0 (0.0)                      | 0 (0.0)                                 | 1 (1.4)                                  | 1 (1.4)                                  | 0 (0.0)                                    | 2 (0.6)                     |
| Aspartate aminotransferase increased                 | 0 (0.0)                      | 0 (0.0)                                 | 1 (1.4)                                  | 1 (1.4)                                  | 0 (0.0)                                    | 2 (0.6)                     |
| Blood uric acid decreased                            | 1 (1.4)                      | 0 (0.0)                                 | 0 (0.0)                                  | 0 (0.0)                                  | 0 (0.0)                                    | 1 (0.3)                     |
| Heart rate increased                                 | 0 (0.0)                      | 1 (1.4)                                 | 0 (0.0)                                  | 0 (0.0)                                  | 0 (0.0)                                    | 1 (0.3)                     |
| Musculoskeletal and connective tissue disorders      | 0 (0.0)                      | 0 (0.0)                                 | 2 (2.8)                                  | 1 (1.4)                                  | 1 (1.4)                                    | 4 (1.1)                     |
| Arthralgia                                           | 0 (0.0)                      | 0 (0.0)                                 | 1 (1.4)                                  | 0 (0.0)                                  | 0 (0.0)                                    | 1 (0.3)                     |
| Back pain                                            | 0 (0.0)                      | 0 (0.0)                                 | 0 (0.0)                                  | 0 (0.0)                                  | 1 (1.4)                                    | 1 (0.3)                     |
| Muscle spasms                                        | 0 (0.0)                      | 0 (0.0)                                 | 0 (0.0)                                  | 1 (1.4)                                  | 0 (0.0)                                    | 1 (0.3)                     |
| Myalgia                                              | 0 (0.0)                      | 0 (0.0)                                 | 1 (1.4)                                  | 0 (0.0)                                  | 0 (0.0)                                    | 1 (0.3)                     |
| Pain in extremity                                    | 0 (0.0)                      | 0 (0.0)                                 | 1 (1.4)                                  | 0 (0.0)                                  | 0 (0.0)                                    | 1 (0.3)                     |
| Skin and subcutaneous tissue disorders               | 0 (0.0)                      | 1 (1.4)                                 | 1 (1.4)                                  | 1 (1.4)                                  | 1 (1.4)                                    | 4 (1.1)                     |
| Eczema                                               | 0 (0.0)                      | 1 (1.4)                                 | 0 (0.0)                                  | 1 (1.4)                                  | 0 (0.0)                                    | 2 (0.6)                     |
| Urticaria                                            | 0 (0.0)                      | 0 (0.0)                                 | 1 (1.4)                                  | 0 (0.0)                                  | 1 (1.4)                                    | 2 (0.6)                     |
| Pruritus                                             | 0 (0.0)                      | 0 (0.0)                                 | 0 (0.0)                                  | 0 (0.0)                                  | 1 (1.4)                                    | 1 (0.3)                     |
| Cardiac disorders                                    | 0 (0.0)                      | 1 (1.4)                                 | 0 (0.0)                                  | 0 (0.0)                                  | 0 (0.0)                                    | 1 (0.3)                     |
| Cardiac flutter                                      | 0 (0.0)                      | 1 (1.4)                                 | 0 (0.0)                                  | 0 (0.0)                                  | 0 (0.0)                                    | 1 (0.3)                     |

A treatment-emergent adverse event was defined as any adverse event that occurred for the first time on or after the date of the first dose of double-blind study medication, or existed prior to the first dose date and worsened during the double-blind treatment period.

Table S1. Summary of Drug-Related Treatment-Emergent Adverse Events by System Organ Class and Preferred Term During the Double-Blind Treatment Period – Safety Population (continued)

| <b>System organ class<br/>Preferred term</b>                                                                                                                                                                                                                                 | <b>Placebo<br/>(N = 71)<br/>n (%)</b> | <b>MSDC-0160<br/>50 mg<br/>(N = 71)<br/>n (%)</b> | <b>MSDC-0160<br/>100 mg<br/>(N = 71)<br/>n (%)</b> | <b>MSDC-0160<br/>150 mg<br/>(N = 70)<br/>n (%)</b> | <b>Pioglitazone<br/>45 mg<br/>(N = 71)<br/>n (%)</b> | <b>Total<br/>(N = 354)<br/>n (%)</b> |
|------------------------------------------------------------------------------------------------------------------------------------------------------------------------------------------------------------------------------------------------------------------------------|---------------------------------------|---------------------------------------------------|----------------------------------------------------|----------------------------------------------------|------------------------------------------------------|--------------------------------------|
| Eye disorders                                                                                                                                                                                                                                                                | 0 (0.0)                               | 0 (0.0)                                           | 1 (1.4)                                            | 0 (0.0)                                            | 0 (0.0)                                              | 1 (0.3)                              |
| Vision blurred                                                                                                                                                                                                                                                               | 0 (0.0)                               | 0 (0.0)                                           | 1 (1.4)                                            | 0 (0.0)                                            | 0 (0.0)                                              | 1 (0.3)                              |
| Infections and infestations                                                                                                                                                                                                                                                  | 1 (1.4)                               | 0 (0.0)                                           | 0 (0.0)                                            | 0 (0.0)                                            | 0 (0.0)                                              | 1 (0.3)                              |
| Urinary tract infection                                                                                                                                                                                                                                                      | 1 (1.4)                               | 0 (0.0)                                           | 0 (0.0)                                            | 0 (0.0)                                            | 0 (0.0)                                              | 1 (0.3)                              |
| Injury, poisoning and procedural complications                                                                                                                                                                                                                               | 0 (0.0)                               | 1 (1.4)                                           | 0 (0.0)                                            | 0 (0.0)                                            | 0 (0.0)                                              | 1 (0.3)                              |
| Fall                                                                                                                                                                                                                                                                         | 0 (0.0)                               | 1 (1.4)                                           | 0 (0.0)                                            | 0 (0.0)                                            | 0 (0.0)                                              | 1 (0.3)                              |
| Metabolism and nutrition disorders                                                                                                                                                                                                                                           | 0 (0.0)                               | 0 (0.0)                                           | 1 (1.4)                                            | 1 (1.4)                                            | 0 (0.0)                                              | 2 (0.6)                              |
| Hypoglycaemia                                                                                                                                                                                                                                                                | 0 (0.0)                               | 0 (0.0)                                           | 0 (0.0)                                            | 1 (1.4)                                            | 0 (0.0)                                              | 1 (0.3)                              |
| Increased appetite                                                                                                                                                                                                                                                           | 0 (0.0)                               | 0 (0.0)                                           | 1 (1.4)                                            | 0 (0.0)                                            | 0 (0.0)                                              | 1 (0.3)                              |
| Respiratory, thoracic and mediastinal disorders                                                                                                                                                                                                                              | 0 (0.0)                               | 0 (0.0)                                           | 0 (0.0)                                            | 0 (0.0)                                            | 1 (1.4)                                              | 1 (0.3)                              |
| Nasal congestion                                                                                                                                                                                                                                                             | 0 (0.0)                               | 0 (0.0)                                           | 0 (0.0)                                            | 0 (0.0)                                            | 1 (1.4)                                              | 1 (0.3)                              |
| Vascular disorders                                                                                                                                                                                                                                                           | 0 (0.0)                               | 0 (0.0)                                           | 0 (0.0)                                            | 1 (1.4)                                            | 0 (0.0)                                              | 1 (0.3)                              |
| Hypertension                                                                                                                                                                                                                                                                 | 0 (0.0)                               | 0 (0.0)                                           | 0 (0.0)                                            | 1 (1.4)                                            | 0 (0.0)                                              | 1 (0.3)                              |
| A treatment-emergent adverse event was defined as any adverse event that occurred for the first time on or after the date of the first dose of double-blind study medication, or existed prior to the first dose date and worsened during the double-blind treatment period. |                                       |                                                   |                                                    |                                                    |                                                      |                                      |
