# Supplementary material for: Clinical Proof-of-Concept Study With MSDC-0160, a Prototype mTOT-Modulating Insulin Sensitizer
Source: PubMed Central journal article supplement — Clin Pharmacol Ther. 2013 Mar 6;93(4):352–9. doi: 10.1038/clpt.2013.10 (PMC3604641; doi:10.1038/clpt.2013.10), 2013-03-06
Supplement: clpt201310x5.pdf [file clpt201310x5.pdf]

**Table S2 Patient Disposition – Randomized Population**

| <b>Category</b>                  | <b>Placebo<br/>(N = 71)<br/>n (%)</b> | <b>MSDC-0160<br/>50 mg<br/>(N = 72)<br/>n (%)</b> | <b>MSDC-0160<br/>100 mg<br/>(N = 71)<br/>n (%)</b> | <b>MSDC-0160<br/>150 mg<br/>(N = 71)<br/>n (%)</b> | <b>Pioglitazone<br/>45 mg<br/>(N = 71)<br/>n (%)</b> | <b>Total (N<br/>= 356) n<br/>(%)</b> |
|----------------------------------|---------------------------------------|---------------------------------------------------|----------------------------------------------------|----------------------------------------------------|------------------------------------------------------|--------------------------------------|
| Randomized                       | 71 (100.0)                            | 72 (100.0)                                        | 71 (100.0)                                         | 71 (100.0)                                         | 71 (100.0)                                           | 356 (100.0)                          |
| Completed                        | 56 (78.9)                             | 59 (81.9)                                         | 62 (87.3)                                          | 56 (78.9)                                          | 64 (90.1)                                            | 297 (83.4)                           |
| Discontinued                     | 15 (21.1)                             | 13 (18.1)                                         | 9 (12.7)                                           | 15 (21.1)                                          | 7 (9.9)                                              | 59 (16.6)                            |
| Withdrawal by patient            | 4 (5.6)                               | 5 (6.9)                                           | 3 (4.2)                                            | 4 (5.6)                                            | 0 (0.0)                                              | 16 (4.5)                             |
| Lost to follow-up                | 4 (5.6)                               | 2 (2.8)                                           | 2 (2.8)                                            | 4 (5.6)                                            | 2 (2.8)                                              | 14 (3.9)                             |
| Required a prohibited medication | 0 (0.0)                               | 0 (0.0)                                           | 1 (1.4)                                            | 0 (0.0)                                            | 0 (0.0)                                              | 1 (0.3)                              |
| Non-compliance with protocol     | 2 (2.8)                               | 4 (5.6)                                           | 0 (0.0)                                            | 3 (4.2)                                            | 1 (1.4)                                              | 10 (2.8)                             |
| Investigator judgment            | 0 (0.0)                               | 1 (1.4)                                           | 0 (0.0)                                            | 1 (1.4)                                            | 0 (0.0)                                              | 2 (0.6)                              |
| Protocol-defined hyperglycemia   | 1 (1.4)                               | 0 (0.0)                                           | 0 (0.0)                                            | 0 (0.0)                                            | 0 (0.0)                                              | 1 (0.3)                              |
| Adverse event                    | 0 (0.0)                               | 1 (1.4)                                           | 1 (1.4)                                            | 1 (1.4)                                            | 0 (0.0)                                              | 3 (0.8)                              |
| Other                            | 4 (5.6)                               | 0 (0.0)                                           | 2 (2.8)                                            | 2 (2.8)                                            | 4 (5.6)                                              | 12 (3.4)                             |
| ITT Population                   | 66 (93.0)                             | 69 (95.8)                                         | 66 (93.0)                                          | 69 (97.2)                                          | 67 (94.4)                                            | 337 (94.7)                           |
| Per-Protocol Population          | 56 (78.9)                             | 48 (66.7)                                         | 52 (73.2)                                          | 47 (66.2)                                          | 55 (77.5)                                            | 258 (72.5)                           |
| Safety Population                | 71 (100.0)                            | 71 (98.6)                                         | 71 (100.0)                                         | 70 (98.6)                                          | 71 (100.0)                                           | 354 (99.4)                           |
