# Supplementary material for: Clinical Proof-of-Concept Study With MSDC-0160, a Prototype mTOT-Modulating Insulin Sensitizer
Source: PubMed Central journal article supplement — Clin Pharmacol Ther. 2013 Mar 6;93(4):352–9. doi: 10.1038/clpt.2013.10 (PMC3604641; doi:10.1038/clpt.2013.10), 2013-03-06
Supplement: clpt201310x6.pdf [file clpt201310x6.pdf]

**Table S3. Change in Fasting Plasma Insulin (µIU/mL) Baseline to Week 12 Endpoint –Per-Protocol Population**

|                                | <b>Placebo<br/>(N = 56)</b> | <b>MSDC-0160<br/>50 mg<br/>(N = 48)</b> | <b>MSDC-0160<br/>100 mg<br/>(N = 52)</b> | <b>MSDC-0160<br/>150 mg<br/>(N = 47)</b> | <b>Pioglitazone<br/>45 mg<br/>(N = 55)</b> |
|--------------------------------|-----------------------------|-----------------------------------------|------------------------------------------|------------------------------------------|--------------------------------------------|
| n [1]                          | 56                          | 48                                      | 52                                       | 47                                       | 55                                         |
| Baseline Mean (SD) [2]         | 16.27 (10.974)              | 16.71 (9.631)                           | 14.91 (10.555)                           | 17.88 (13.988)                           | 13.32 (6.081)                              |
| Week 12 Endpoint Mean (SD) [3] | 14.29 (10.302)              | 14.64 (9.187)                           | 14.73 (16.014)                           | 12.61 (8.757)                            | 11.12 (8.005)                              |
| Change From Baseline           |                             |                                         |                                          |                                          |                                            |
| LS Mean (SE)                   | -1.79 (1.146)               | -1.73 (1.239)                           | -0.49 (1.190)                            | -4.50 (1.256)                            | -3.07 (1.163)                              |
| 95% CI                         | (-4.05, 0.47)               | (-4.17, 0.71)                           | (-2.83, 1.86)                            | (-6.97, -2.03)                           | (-5.36, -0.78)                             |
| <b>Treatment Comparisons</b>   |                             |                                         |                                          |                                          |                                            |
| vs. Placebo                    |                             |                                         |                                          |                                          |                                            |
| LS Mean (SE)                   |                             | 0.06 (1.687)                            | 1.30 (1.653)                             | -2.71 (1.698)                            | -1.28 (1.635)                              |
| 95% CI                         |                             | (-3.26, 3.38)                           | (-1.95, 4.56)                            | (-6.06, 0.63)                            | (-4.50, 1.94)                              |
| p-value                        |                             | 0.9725                                  | 0.4314                                   | 0.1114                                   | 0.4328                                     |
| vs. Pioglitazone               |                             |                                         |                                          |                                          |                                            |
| LS Mean (SE)                   |                             | 1.34 (1.703)                            | 2.59 (1.660)                             | -1.43 (1.719)                            |                                            |
| 95% CI                         |                             | (-2.01, 4.70)                           | (-0.68, 5.86)                            | (-4.81, 1.96)                            |                                            |
| p-value                        |                             | 0.4311                                  | 0.1205                                   | 0.4069                                   |                                            |

All post-baseline efficacy measurements taken 6 or more ( $\geq 6$ ) days after the last dose of study medication were not included.

Least-squares means, standard errors, confidence intervals, and p-values were from linear contrasts of an ANCOVA model with treatment group as a factor and baseline as a covariate.

\*Indicates statistical significance at 0.05 level.

1. n was the number of patients with values at both baseline and endpoint.
2. Baseline was defined as the measurement at Visit 2. If the Visit 2 measurement was missing, the last valid measurement prior to the first dose of randomized double-blind study medication was used.
3. Week 12 endpoint was defined as the Visit 6 (Week 12) measurement. If the Visit 6 (Week 12) measurement was missing, the last valid post-baseline measurement during the double-blind treatment period was carried forward as the endpoint measurement.

ANCOVA = analysis of covariance; CI = confidence interval; LS = least squares; SD = standard deviation; SE = standard error; vs. = versus.
