# Supplementary material for: Clinical Proof-of-Concept Study With MSDC-0160, a Prototype mTOT-Modulating Insulin Sensitizer
Source: PubMed Central journal article supplement — Clin Pharmacol Ther. 2013 Mar 6;93(4):352–9. doi: 10.1038/clpt.2013.10 (PMC3604641; doi:10.1038/clpt.2013.10), 2013-03-06
Supplement: clpt201310x7.pdf [file clpt201310x7.pdf]

**Table S4. Summary of Edema Severity Over Time – Safety Population**

| <b>Visit Category</b> | <b>Placebo<br/>(N = 71)<br/>n (%)</b> | <b>MSDC-0160<br/>50 mg<br/>(N = 71)<br/>n (%)</b> | <b>MSDC-0160<br/>100 mg<br/>(N = 71)<br/>n (%)</b> | <b>MSDC-0160<br/>150 mg<br/>(N = 70)<br/>n (%)</b> | <b>Pioglitazone<br/>45 mg<br/>(N = 71)<br/>n (%)</b> | <b>Total (N = 354) n (%)</b> |
|-----------------------|---------------------------------------|---------------------------------------------------|----------------------------------------------------|----------------------------------------------------|------------------------------------------------------|------------------------------|
| <b>Baseline</b>       | N' = 71                               | N' = 70                                           | N' = 71                                            | N' = 70                                            | N' = 71                                              | N' = 353                     |
| Absent                | 63 (88.7)                             | 62 (88.6)                                         | 62 (87.3)                                          | 66 (94.3)                                          | 65 (91.5)                                            | 318 (90.1)                   |
| 1+                    | 6 (8.5)                               | 7 (10.0)                                          | 6 (8.5)                                            | 3 (4.3)                                            | 5 (7.0)                                              | 27 (7.6)                     |
| 2+                    | 2 (2.8)                               | 1 (1.4)                                           | 1 (1.4)                                            | 0 (0.0)                                            | 0 (0.0)                                              | 4 (1.1)                      |
| 3+                    | 0 (0.0)                               | 0 (0.0)                                           | 1 (1.4)                                            | 1 (1.4)                                            | 1 (1.4)                                              | 3 (0.8)                      |
| 4+                    | 0 (0.0)                               | 0 (0.0)                                           | 1 (1.4)                                            | 0 (0.0)                                            | 0 (0.0)                                              | 1 (0.3)                      |
| <b>Week 4</b>         | N' = 62                               | N' = 66                                           | N' = 66                                            | N' = 69                                            | N' = 71                                              | N' = 334                     |
| Absent                | 56 (90.3)                             | 61 (92.4)                                         | 60 (90.9)                                          | 65 (94.2)                                          | 66 (93.0)                                            | 308 (92.2)                   |
| 1+                    | 5 (8.1)                               | 5 (7.6)                                           | 3 (4.5)                                            | 3 (4.3)                                            | 4 (5.6)                                              | 20 (6.0)                     |
| 2+                    | 1 (1.6)                               | 0 (0.0)                                           | 2 (3.0)                                            | 0 (0.0)                                            | 0 (0.0)                                              | 3 (0.9)                      |
| 3+                    | 0 (0.0)                               | 0 (0.0)                                           | 1 (1.5)                                            | 1 (1.4)                                            | 1 (1.4)                                              | 3 (0.9)                      |
| 4+                    | 0 (0.0)                               | 0 (0.0)                                           | 0 (0.0)                                            | 0 (0.0)                                            | 0 (0.0)                                              | 0 (0.0)                      |
| <b>Week 12</b>        | N' = 56                               | N' = 60                                           | N' = 62                                            | N' = 59                                            | N' = 64                                              | N' = 301                     |
| Absent                | 51 (91.1)                             | 57 (95.0)                                         | 57 (91.9)                                          | 56 (94.9)                                          | 59 (92.2)                                            | 280 (93.0)                   |
| 1+                    | 4 (7.1)                               | 3 (5.0)                                           | 2 (3.2)                                            | 1 (1.7)                                            | 4 (6.3)                                              | 14 (4.7)                     |
| 2+                    | 1 (1.8)                               | 0 (0.0)                                           | 2 (3.2)                                            | 1 (1.7)                                            | 0 (0.0)                                              | 4 (1.3)                      |
| 3+                    | 0 (0.0)                               | 0 (0.0)                                           | 1 (1.6)                                            | 1 (1.7)                                            | 1 (1.6)                                              | 3 (1.0)                      |
| 4+                    | 0 (0.0)                               | 0 (0.0)                                           | 0 (0.0)                                            | 0 (0.0)                                            | 0 (0.0)                                              | 0 (0.0)                      |

N' is the number of patients who had an assessment of edema at the specified visit.  
 Baseline was defined as the measurement at Visit 2. If the Visit 2 measurement was missing, the last valid measurement prior to the first dose of randomized double-blind study medication was used.
