# Supplementary figures and images for: Clinical Proof-of-Concept Study With MSDC-0160, a Prototype mTOT-Modulating Insulin Sensitizer
Source: PubMed Central journal article supplement — Clin Pharmacol Ther. 2013 Mar 6;93(4):352–9. doi: 10.1038/clpt.2013.10 (PMC3604641; doi:10.1038/clpt.2013.10), 2013-03-06

**A. Plasma Glucose**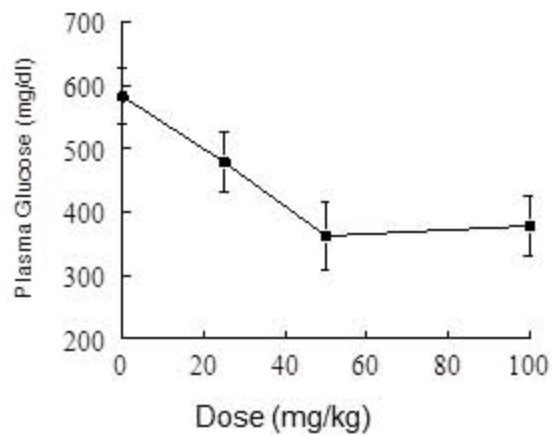**Plasma Insulin**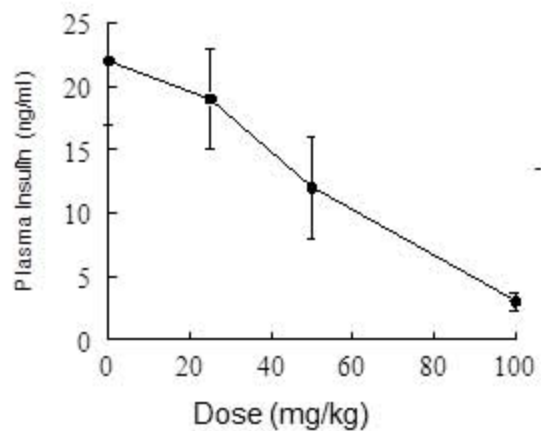**Plasma Triglycerides**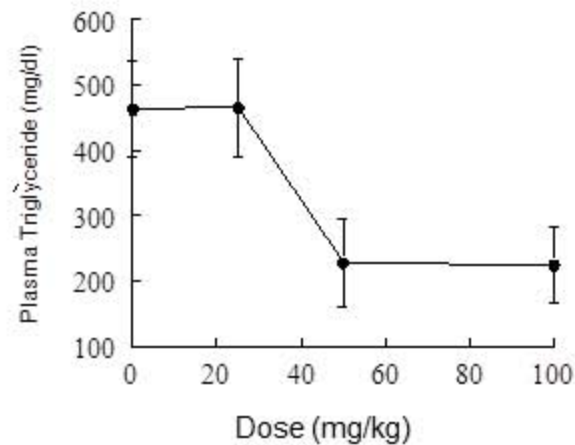**B.****PPAR $\gamma$  Binding**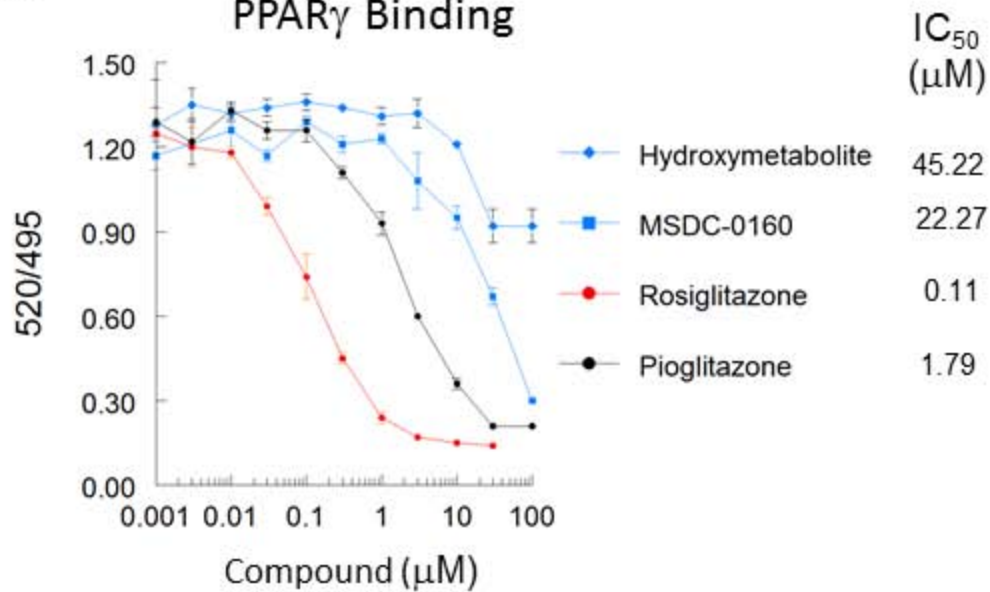

Supplement: clpt201310x1.pdf [file clpt201310x1.pdf]

# Triglycerides at 12 Week Endpoint

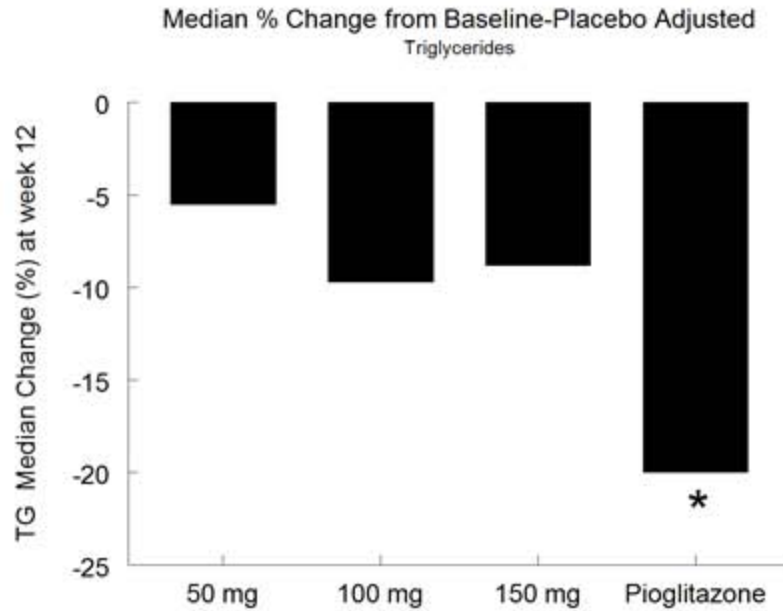

|                          |              |            |              |             |
|--------------------------|--------------|------------|--------------|-------------|
| <b>Median Difference</b> | -5.5         | -9.7       | -8.8         | -20         |
| <b>95% CI</b>            | (-16.2, 9.1) | (-22, 1.8) | (-22.2, 4.8) | (-32.8, -7) |
| <b>p-value</b>           | .395         | .093       | .200         | .003        |

Supplement: clpt201310x3.pdf [file clpt201310x3.pdf]
